# Supplementary material
Source: PubMed Central journal article supplement (PMC4306506)
Supplement: jm501345y_si_001.pdf [file jm501345y_si_001.pdf]

# Supporting Information

## New compstatin peptides containing N-terminal extensions and non-natural amino acids exhibit potent complement inhibition and improved solubility characteristics

*Ronald D. Gorham Jr.,<sup>†</sup> David L. Forest,<sup>‡</sup> George A. Khoury,<sup>⊥</sup> James Smadbeck,<sup>⊥</sup> Consuelo N. Beecher,<sup>§</sup> Evangeline D. Healy,<sup>‡</sup> Phanourios Tamamis,<sup>¶</sup>⊥ Georgios Archontis,<sup>¶</sup> Cynthia K. Larive,<sup>§</sup> Christodoulos A. Floudas,<sup>⊥</sup> Monte J. Radeke,<sup>‡</sup> Lincoln V. Johnson,<sup>‡</sup> and Dimitrios Morikis<sup>†,\*</sup>*

<sup>†</sup>Department of Bioengineering, University of California, Riverside, CA 92521, USA

<sup>‡</sup>Center for the Study of Macular Degeneration, Neuroscience Research Institute, University of California, Santa Barbara, CA 93106, USA

<sup>⊥</sup> Department of Chemical and Biological Engineering, Princeton University, Princeton, NJ 08544, USA

<sup>§</sup>Department of Chemistry, University of California, Riverside, CA 92521, USA

<sup>¶</sup>Department of Physics, University of Cyprus, PO20537, CY1678 Nicosia, Cyprus

Corresponding Author: Dimitrios Morikis, Department of Bioengineering, University of California, Riverside, CA 92521; Tel.: +1-951-827-2696; Fax: +1-951-827-6416; E-mail address: dmorikis@ucr.edu.

### Table of Contents:

|                   |     |
|-------------------|-----|
| Supporting Tables | S2  |
| Supporting Figure | S13 |
| References        | S14 |

**Table S1.** List of candidate peptides computationally evaluated in the peptide re-design with non-natural amino acids, and their calculated metrics.<sup>a</sup>

| Sequence Solution | Position 4 <sup>b</sup> | Position 9 <sup>c</sup> | Contact Score   | K*               | K* rank   |
|-------------------|-------------------------|-------------------------|-----------------|------------------|-----------|
| 7                 | <b>meW</b>              | <b>Nal</b>              | <b>1.015974</b> | <b>2.709E+27</b> | <b>1</b>  |
| 12                | <b>Trp</b>              | <b>Rea</b>              | <b>0.02375</b>  | <b>3.082E+12</b> | <b>2</b>  |
| 14                | <b>Trp</b>              | <b>Aal</b>              | <b>0.021505</b> | <b>3.803E+11</b> | <b>3</b>  |
| <b>6</b>          | <b>meW</b>              | <b>Ala</b>              | <b>1.017813</b> | <b>4.489E+10</b> | <b>4</b>  |
| <b>17</b>         | <b>Trp</b>              | <b>Ala</b>              | <b>0.019472</b> | <b>1.829E+07</b> | <b>5</b>  |
| 2                 | meW                     | Sea                     | 1.033698        | 7.042E+02        | 6         |
| 3                 | meW                     | Rea                     | 1.022091        | 1.315E+02        | 7         |
| <b>10</b>         | <b>Trp</b>              | <b>Sea</b>              | <b>0.035357</b> | <b>1.274E+01</b> | <b>8</b>  |
| 15                | Nmw                     | Aal                     | 0.021354        | 5.842E-02        | 9         |
| 19                | Nmw                     | Ala                     | 0.019322        | 3.412E-02        | 10        |
| 1                 | meW                     | Nma                     | 1.862203        | 3.818E-04        | 11        |
| 11                | Nmw                     | Sea                     | 0.035207        | 1.069E-06        | 12        |
| 4                 | meW                     | Aal                     | 1.019845        | 1.746E-14        | 13        |
| 16                | Trp                     | Pal                     | 0.019472        | 1.615E-14        | 14        |
| 18                | Nmw                     | Pal                     | 0.019322        | 8.196E-15        | 15        |
| <b>20</b>         | <b>Trp</b>              | <b>Nal</b>              | <b>0.017634</b> | <b>2.607E-19</b> | <b>16</b> |
| 8                 | Trp                     | Nma                     | 0.863863        | 5.197E-21        | 17        |
| 13                | Nmw                     | Rea                     | 0.0236          | 3.853E-26        | 18        |
| 5                 | meW                     | Pal                     | 1.017813        | 1.314E-31        | 19        |
| 21                | Nmw                     | Nal                     | 0.017483        | 1.958E-36        | 20        |
| 9                 | Nmw                     | Nma                     | 0.863712        | 1.656E-53        | 21        |

<sup>a</sup> Peptides in bold were experimentally tested. Peptides in bold and red color are controls.

<sup>b</sup> Amino acid abbreviations in position 4: tryptophan (Trp), 5-hydroxytryptophan, 5-methyltryptophan, N-methyltryptophan (Nmw), 1-methyltryptophan (meW), and 7-hydroxytryptophan.

<sup>c</sup> Amino acid abbreviations in position 9: alanine (Ala), 1-naphthylalanine (Nal), N-methylalanine (Nma), Pyrenylalanine (Pal), (R)- $\alpha$ -ethylalanine (Rea), (S)- $\alpha$ -ethylalanine (Sea), and R(+)- $\alpha$ -allyl-alanine (Aal).

**Table S2.** List of fold specificity (FS) rankings for peptides chosen for approximate binding affinity validation, in the *de novo* peptide design with natural amino acids. Rankings are out of the consensus 1019 sequences from sequence selection.<sup>a</sup>

| Sequence ID | Position -1 | Position 0 | Position 1 | Peptide 9 FS Rank | SS-W4A9 FS Rank | Combined FS Rank |
|-------------|-------------|------------|------------|-------------------|-----------------|------------------|
| Tri1        | Asn         | Arg        | Asp        | -                 | 1               | 1                |
| Tri2        | Asn         | Asn        | Asn        | 1                 | 5               | 3                |
| Tri3        | Asn         | Arg        | Asn        | 2                 | 4               | 2                |
| Tri4        | Asp         | Asn        | Asn        | 3                 | 2               | 4                |
| Tri5        | Gln         | Asn        | Asn        | 6                 | -               | -                |
| Tri6        | Asp         | Arg        | Trp        | 8                 | 13              | 16               |
| Tri7        | Asn         | Glu        | Asn        | -                 | 12              | 10               |
| Tri8        | Asn         | Gln        | Asp        | -                 | 9               | 13               |
| Tri9        | Asn         | Thr        | Asn        | 11                | 19              | 11               |
| Tri10       | Glu         | Arg        | Trp        | 22                | 15              | 12               |
| Tri11       | Asp         | Trp        | Arg        | -                 | 14              | 15               |
| Tri12       | Asn         | Asn        | Leu        | 12                | 20              | 11               |
| Tri13       | Asn         | Asn        | Tyr        | 13                | 23              | 20               |
| Tri14       | Asn         | Arg        | Leu        | 15                | 17              | 17               |
| Tri15       | Asp         | Asn        | Phe        | -                 | -               | 22               |
| Di1         | Asp         | Arg        | Ile        | 9                 | 10              | 14               |
| Di2         | Glu         | Arg        | Ile        | 19                | 18              | 21               |
| Di3         | Asp         | Asn        | Ile        | 35                | 33              | 19               |
| Di4         | Asn         | Asn        | Ile        | 31                | 38              | 34               |
| Di5         | Arg         | Gln        | Ile        | 46                | -               | -                |
| Di6         | Asn         | Gln        | Ile        | 47                | -               | -                |
| Di7         | Asp         | Gln        | Ile        | 50                | -               | -                |

<sup>a</sup> “-” indicates the peptide was not ranked in the top 50 for the structure set.

**Table S3.** List of peptides with approximate binding affinities ( $K^*$ )<sup>1</sup> calculated to be higher than the reference peptide, W4A9, in the *de novo* peptide design with natural amino acids. Note that the Boltzmann average energy for the protein,  $q_P$ , is not provided as no mutations were introduced into the protein so it is a constant in the calculation.<sup>a</sup>

| Sequence ID | Position -1 | Position 0 | Position 1 | $q_L$     | $q_{PL}$ | $K^*$    |
|-------------|-------------|------------|------------|-----------|----------|----------|
| Native      | -           | -          | Ile        | 6.16E+239 | 1.83E+16 | 6.40E+0  |
| Tri8        | Asn         | Gln        | Asp        | 1.31E+261 | 6.06E+20 | 4.13E+17 |
| Tri10       | Glu         | Arg        | Trp        | 2.75E+250 | 6.71E+19 | 7.82E+7  |
| *Tri12      | Asn         | Asn        | Leu        | 3.06E+254 | 2.76E+19 | 2.11E+12 |
| *Tri14      | Asn         | Arg        | Leu        | 1.39E+245 | 7.74E+19 | 3.43E+2  |
| Tri15       | Asp         | Asn        | Phe        | 2.62E+261 | 1.46E+20 | 3.42E+18 |
| *Di2        | Glu         | Arg        | Ile        | 2.99E+262 | 2.47E+19 | 2.30E+20 |

<sup>a</sup> \* indicates a peptide chosen for experimental testing.

**Table S4.** Summary of IC50 values for compstatin peptides in C3b and C5b-9 ELISAs and hemolytic assays.

| <b>Peptide</b> | <b>C3b ELISA (<math>\mu\text{M}</math>)<sup>a</sup></b> | <b>C5b-9 ELISA (<math>\mu\text{M}</math>)<sup>a</sup></b> | <b>Hemolysis (<math>\mu\text{M}</math>)<sup>a</sup></b> |
|----------------|---------------------------------------------------------|-----------------------------------------------------------|---------------------------------------------------------|
| 1              | 1.21 +/- 0.31                                           | 0.95 +/- 0.09                                             | 0.90 +/- 0.06                                           |
| 2              | 2.27 +/- 0.39                                           | 2.35 +/- 0.25                                             | 1.27 +/- 0.13                                           |
| 3              | 0.77 +/- 0.14                                           | 0.83 +/- 0.08                                             | 0.69 +/- 0.13                                           |
| 4              | 0.65 +/- 0.17                                           | 0.84 +/- 0.09                                             | 0.62 +/- 0.10                                           |
| 5              | 0.45 +/- 0.14                                           | 0.71 +/- 0.07                                             | 0.48 +/- 0.08                                           |
| 6              | 0.84 +/- 0.06                                           | 0.50 +/- 0.06                                             | 0.78 +/- 0.21                                           |
| 7              | 0.57 +/- 0.05                                           | 0.46 +/- 0.09                                             | 0.30 +/- 0.10                                           |
| 8              | 0.53 +/- 0.04                                           | 0.45 +/- 0.04                                             | 0.25 +/- 0.09                                           |
| 9              | 0.58 +/- 0.10                                           | 0.59 +/- 0.05                                             | 0.25 +/- 0.11                                           |
| 10             | 2.85 +/- 0.11                                           | 1.76 +/- 0.11                                             | 2.30 +/- 0.19                                           |
| 11             | 2.75 +/- 0.11                                           | 1.88 +/- 0.09                                             | 1.90 +/- 0.18                                           |
| 12             | 1.90 +/- 0.10                                           | 1.20 +/- 0.06                                             | 1.13 +/- 0.10                                           |
| 13             | 2.89 +/- 0.14                                           | 1.99 +/- 0.11                                             | 1.74 +/- 0.14                                           |
| 14             | 3.85 +/- 0.17                                           | 2.37 +/- 0.21                                             | 2.79 +/- 0.17                                           |
| 15             | 3.71 +/- 0.19                                           | 2.40 +/- 0.25                                             | 2.17 +/- 0.15                                           |
| 16             | 2.20 +/- 0.11                                           | 1.34 +/- 0.09                                             | 1.23 +/- 0.12                                           |
| 17             | 4.06 +/- 0.22                                           | 2.35 +/- 0.16                                             | 2.68 +/- 0.18                                           |
| 18             | 1.26 +/- 0.11                                           | 0.88 +/- 0.13                                             | 1.49 +/- 0.13                                           |
| 19             | 1.31 +/- 0.09                                           | 0.82 +/- 0.13                                             | 1.06 +/- 0.14                                           |
| 20             | 1.08 +/- 0.07                                           | 0.65 +/- 0.10                                             | 1.01 +/- 0.11                                           |
| W4A9           | 0.77 +/- 0.06                                           | 0.60 +/- 0.04                                             | 0.66 +/- 0.07                                           |
| meW4A9         | 0.43 +/- 0.04                                           | 0.49 +/- 0.06                                             | 0.59 +/- 0.06                                           |
| Parent         | 6.17 +/- 1.03                                           | 13.00 +/- 1.13                                            | 3.91 +/- 0.91                                           |

<sup>a</sup> Values represent mean IC50 value (from three independent experiments) +/- 95% confidence intervals.

**Table S5.** Statistical analysis (2-tail Mann-Whitney U test) of compstatin peptides compared to the positive control in the RPE cell *in vitro* assay.

| Sample     | Significance |       | <i>p</i> -value |         |
|------------|--------------|-------|-----------------|---------|
|            | 72810        | 81309 | 72810           | 81309   |
| Parent     | ns           | ns    | 0.96810         | 0.94490 |
| Linear     | ns           | ns    | 0.30772         | 0.27134 |
| W4A9       | *            | *     | 0.00100         | 0.00034 |
| Peptide 5  | *            | *     | 0.01140         | 0.00132 |
| Peptide 8  | *            | *     | 0.00044         | 0.00168 |
| Peptide 12 | *            | *     | 0.00222         | 0.00362 |
| Peptide 18 | *            | *     | 0.00132         | 0.00168 |
| Peptide 19 | *            | *     | 0.00018         | 0.01390 |

\* significant difference, *p*-value  $\leq 0.05$ , ns: non-significant

**Table S6.** Statistical analysis (2-tail Mann-Whitney U test) of compstatin peptides compared to the W4A9 in the RPE cell *in vitro* assay.

| Sample     | Significance |       | <i>p</i> -value |         |
|------------|--------------|-------|-----------------|---------|
|            | 72810        | 81309 | 72810           | 81309   |
| Parent     | *            | *     | 0.00058         | 0.00018 |
| Linear     | *            | *     | 0.01140         | 0.00034 |
| Peptide 5  | ns           | ns    | 0.10310         | 0.08914 |
| Peptide 8  | ns           | *     | 0.27134         | 0.02574 |
| Peptide 12 | ns           | *     | 0.24200         | 0.06432 |
| Peptide 18 | ns           | ns    | 0.56868         | 0.07508 |
| Peptide 19 | *            | *     | 0.03156         | 0.01732 |

\* significant difference, *p*-value  $\leq 0.05$ , ns: non-significant

**Table S7.** Apparent solubility of compstatin peptides.

| Peptide | Solubility (mg/ml) <sup>a</sup> |
|---------|---------------------------------|
| 1       | 0.11 ± 0.03                     |
| 2       | 0.15 ± 0.01                     |
| 3       | 3.60 ± 0.44                     |
| 4       | 3.35 ± 0.17                     |
| 5       | 3.47 ± 0.17                     |
| 6       | 4.29 ± 0.26                     |
| 7       | 3.92 ± 0.35                     |
| 8       | 1.05 ± 0.07                     |
| 9       | 3.69 ± 0.16                     |
| 10      | 0.38 ± 0.04                     |
| 11      | 0.27 ± 0.12                     |
| 12      | 0.34 ± 0.14                     |
| 13      | 0.39 ± 0.04                     |
| 14      | 0.16 ± 0.03                     |
| 15      | 0.27 ± 0.05                     |
| 16      | 0.30 ± 0.07                     |
| 17      | 0.20 ± 0.05                     |
| 18      | 2.84 ± 2.30                     |
| 19      | 2.11 ± 0.21                     |
| 20      | 2.17 ± 0.22                     |
| W4A9    | 3.22 ± 0.11                     |
| meW4A9  | 1.92 ± 0.13                     |
| Parent  | 4.46 ± 0.25                     |

<sup>a</sup> Values represent mean IC50 value (from three independent measurements of same sample) +/- standard deviation.



**Table S8.** RP-HPLC retention times and factors for compstatin peptides, separated by substitution patterns as in Table 1.

| Peptide | Retention Time (min) <i>k</i> log( <i>k</i> ) |                |        | Retention Time (min) <i>k</i> log( <i>k</i> ) |               |        |
|---------|-----------------------------------------------|----------------|--------|-----------------------------------------------|---------------|--------|
|         | Method 1 (32% B)                              |                |        | Method 2 (28% B)                              |               |        |
| 1       | 15.786 ± 0.019                                | 10.132 ± 0.005 | 1.006  |                                               |               |        |
| 2       | 8.511 ± 0.013                                 | 5.002 ± 0.006  | 0.699  |                                               |               |        |
| 3       | 3.275 ± 0.006                                 | 1.310 ± 0.008  | 0.117  | 6.976 ± 0.015                                 | 3.895 ± 0.008 | 0.591  |
| 4       | 3.355 ± 0.002                                 | 1.366 ± 0.006  | 0.136  | 7.276 ± 0.009                                 | 4.106 ± 0.007 | 0.613  |
| 5       | 3.131 ± 0.006                                 | 1.208 ± 0.010  | 0.082  | 6.459 ± 0.004                                 | 3.533 ± 0.007 | 0.548  |
| 6       | 1.868 ± 0.002                                 | 0.317 ± 0.020  | -0.499 | 2.309 ± 0.001                                 | 0.620 ± 0.015 | -0.208 |
| 7       | 1.979 ± 0.001                                 | 0.396 ± 0.015  | -0.402 | 2.917 ± 0.001                                 | 1.047 ± 0.010 | 0.020  |
| 8       | 2.185 ± 0.001                                 | 0.541 ± 0.011  | -0.267 | 3.519 ± 0.002                                 | 1.469 ± 0.009 | 0.167  |
| 9       | 2.118 ± 0.001                                 | 0.494 ± 0.013  | -0.306 | 3.346 ± 0.002                                 | 1.348 ± 0.009 | 0.130  |
| 10      | 3.297 ± 0.007                                 | 1.325 ± 0.010  | 0.122  |                                               |               |        |
| 11      | 4.381 ± 0.005                                 | 2.089 ± 0.006  | 0.320  |                                               |               |        |
| 12      | 5.231 ± 0.010                                 | 2.689 ± 0.007  | 0.430  |                                               |               |        |
| 13      | 5.122 ± 0.003                                 | 2.612 ± 0.005  | 0.417  |                                               |               |        |
| 14      | 6.053 ± 0.002                                 | 3.269 ± 0.004  | 0.514  |                                               |               |        |
| 15      | 9.782 ± 0.005                                 | 5.899 ± 0.004  | 0.771  |                                               |               |        |
| 16      | 11.768 ± 0.017                                | 7.299 ± 0.005  | 0.863  |                                               |               |        |
| 17      | 11.452 ± 0.016                                | 7.076 ± 0.005  | 0.850  |                                               |               |        |
| 18      | 1.858 ± 0.005                                 | 0.310 ± 0.030  | -0.509 | 2.104 ± 0.003                                 | 0.477 ± 0.020 | -0.322 |
| 19      | 3.077 ± 0.001                                 | 1.170 ± 0.006  | 0.068  | 7.134 ± 0.003                                 | 4.007 ± 0.006 | 0.603  |
| 20      | 3.168 ± 0.001                                 | 1.234 ± 0.006  | 0.091  | 7.483 ± 0.003                                 | 4.251 ± 0.006 | 0.628  |
| W4A9    | 2.778 ± 0.002                                 | 0.959 ± 0.008  | -0.018 | 5.226 ± 0.002                                 | 2.668 ± 0.007 | 0.426  |
| meW4A9  | 4.016 ± 0.007                                 | 1.832 ± 0.007  | 0.263  | 9.834 ± 0.005                                 | 5.901 ± 0.006 | 0.771  |
| Parent  | 1.932 ± 0.003                                 | 0.363 ± 0.020  | -0.440 | 2.582 ± 0.002                                 | 0.812 ± 0.013 | -0.090 |

<sup>a</sup> Values represent mean IC50 value (from three independent measurements of same sample) +/- standard deviation. Methods 1 and 2 are described in the Experimental Section.

**Table S9.** List of compstatin peptides in order of increasing lipophilicity based on their  $\log(k)$  using Method 2.

| <b>Peptide</b> | <b><math>\log(k)</math></b> |
|----------------|-----------------------------|
| 18             | -0.509                      |
| 6              | -0.499                      |
| Parent         | -0.440                      |
| 7              | -0.402                      |
| 9              | -0.306                      |
| 8              | -0.267                      |
| W4A9           | -0.018                      |
| 19             | 0.068                       |
| 5              | 0.082                       |
| 20             | 0.091                       |
| 3              | 0.117                       |
| 10             | 0.122                       |
| 4              | 0.136                       |
| meW4A9         | 0.263                       |
| 11             | 0.320                       |
| 13             | 0.417                       |
| 12             | 0.430                       |
| 14             | 0.514                       |
| 2              | 0.699                       |
| 15             | 0.771                       |
| 17             | 0.850                       |
| 16             | 0.863                       |
| 1              | 1.006                       |

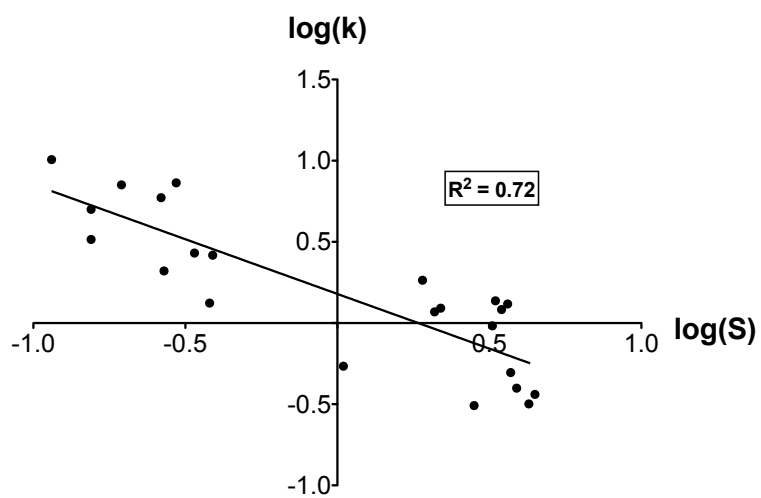

**Figure S1.** Log-log plot of retention factor (lipophilicity) versus solubility. The trendline shows negative correlation between  $\log(k)$  and  $\log(S)$  values.

## References

- (1) Smadbeck, J.; Peterson, M. B.; Khoury, G. A.; Taylor, M. S.; Floudas, C. A. Protein WISDOM: a Workbench for in Silico De Novo Design of Biomolecules. *J. Vis. Exp.* **2013**, e50476–e50476.
